# Supplementary material for: Hyper oxygen incorporation in CeF3: a new intermediate-band photocatalyst for antibiotic degradation under visible/NIR light
Source: Royal Society of Chemistry journal article supplement (doi:10.1039/d0ra06107g), 2020-01-01
Supplement: d0ra06107g1.pdf [file d0ra06107g1.pdf]

Supporting Information  
**Hyper Oxygen Incorporation in CeF<sub>3</sub>: A New Intermediate-Band  
Photocatalyst for Antibiotic Degradation under Visible/NIR Light**

*Bing Han<sup>a</sup>, Siqi Yu<sup>a</sup>, Dian Zhao<sup>a,b</sup>, Yunchao Lou<sup>a</sup>, Jiayang Gao<sup>a</sup>, Zhe Liu<sup>a</sup>, Zhiyu Wang<sup>a,\*</sup> and  
Guodong Qian<sup>a,\*</sup>*

<sup>a</sup> State Key Laboratory of Silicon Materials, Department of Materials Science and Engineering, Zhejiang University, Hangzhou 310027, China

Corresponding Author: Prof. Zhiyu Wang, Prof. Guodong Qian

E-mail: wangzhiyu@zju.edu.cn, gdqian@zju.edu.cn

<sup>b</sup> Key Laboratory of the Ministry of Education for Advanced Catalysis Materials, College of Chemistry and Life Sciences, Zhejiang Normal University, Jinhua, 321004, China

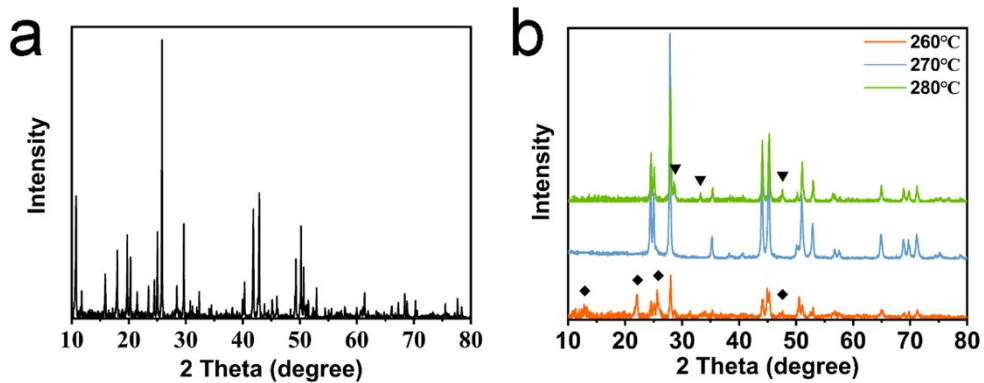

**Figure S1.** the typical XRD patterns of the precursor JCPDS NO.70-4378(a); samples calcined at different temperature(b). ◆ sign is the precursor ; ▼ sign is CeO<sub>2</sub> (JCPDS NO. 08-0045).

**Table S1.** The element content of CeF<sub>3</sub>-O

| Element  | Ce    | F     | O     |
|----------|-------|-------|-------|
| Atomic % | 21.45 | 62.82 | 15.73 |

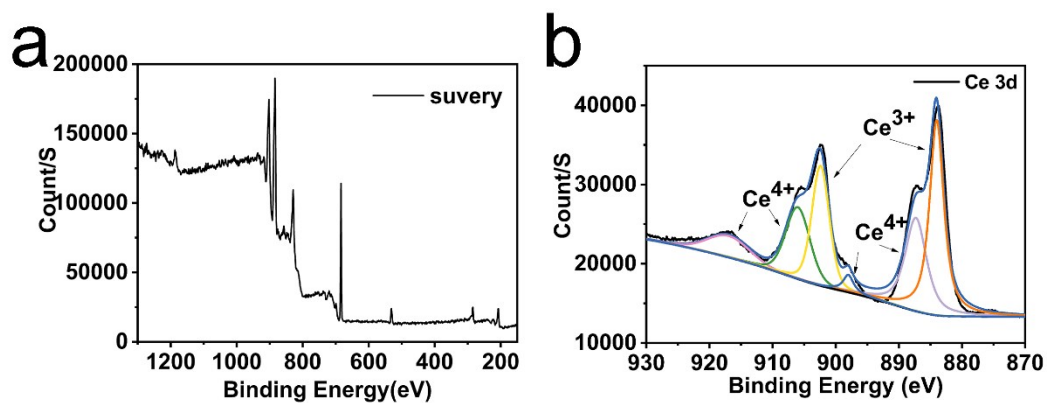

**Figure S2.** The survey spectrum of CeF<sub>3</sub>-O XPS: Ce 3d<sub>5</sub> (884.1 eV), F 1s (684.4 eV), O 1s (531.7 eV), Ce Auger (830.0 eV), and Ce 3d<sub>3</sub> (902.4 eV) (a); The spectrum of Ce 3d (b).

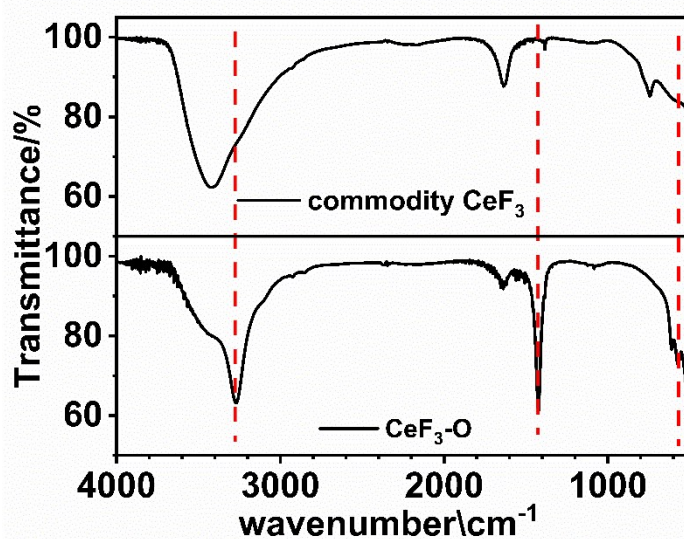

**Figure S3.** FTIR spectra of commercial  $\text{CeF}_3$  and  $\text{CeF}_3\text{-O}$ . The peak at  $750\text{ cm}^{-1}$  of commercial  $\text{CeF}_3$  is attributed to  $\text{-CH}_2\text{-}$ , and it maybe from organ impurity.

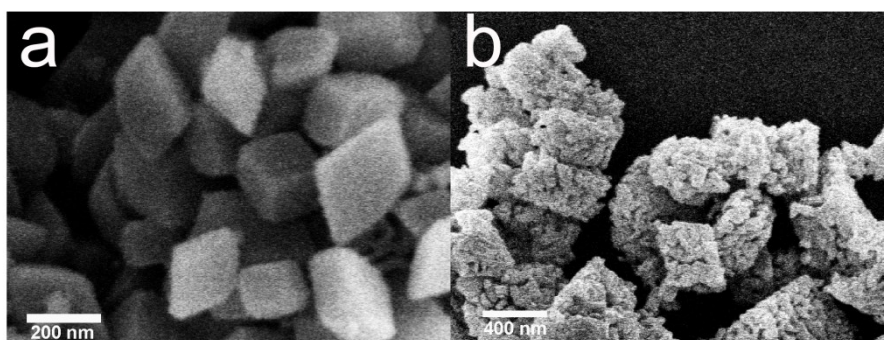

**Figure S4.** SEM of the precursor  $\text{H}_{25.5}(\text{NH}_4)_{10.5}\text{Ce}_9\text{O}_{27}\text{F}_{18}$  (a) and  $\text{CeF}_3\text{-O}$ (b)

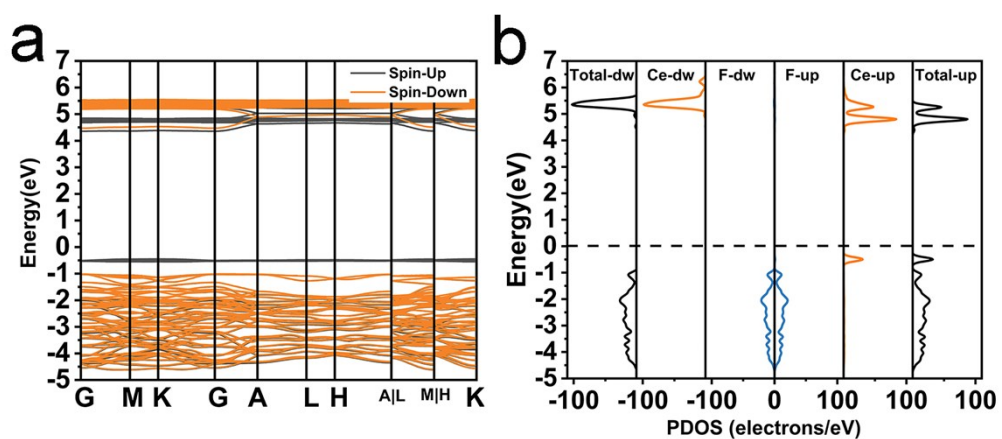

**Figure S5.** The calculated band structure and DOS of pristine  $\text{CeF}_3$ .

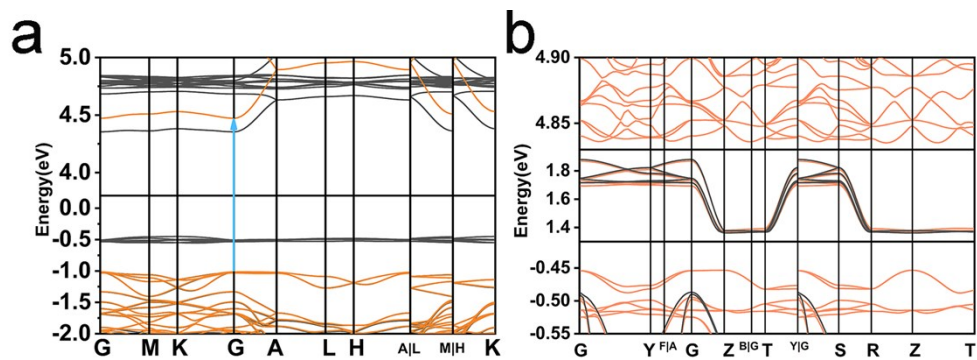

Figure S6. partial enlargement of DFT calculated band structure of pristine  $\text{CeF}_3$  and  $\text{CeF}_3\text{-O}$ .

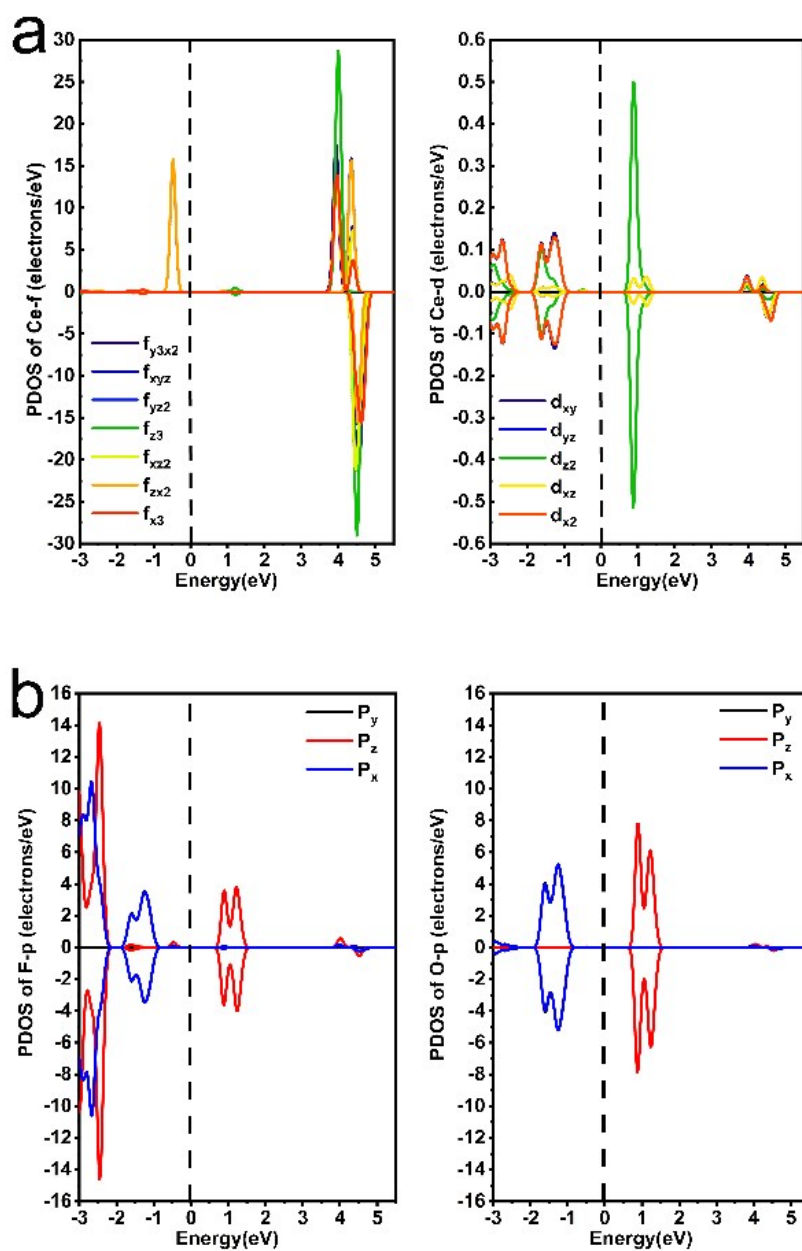

Figure S7. PDOS of Ce(a), O and F(b).

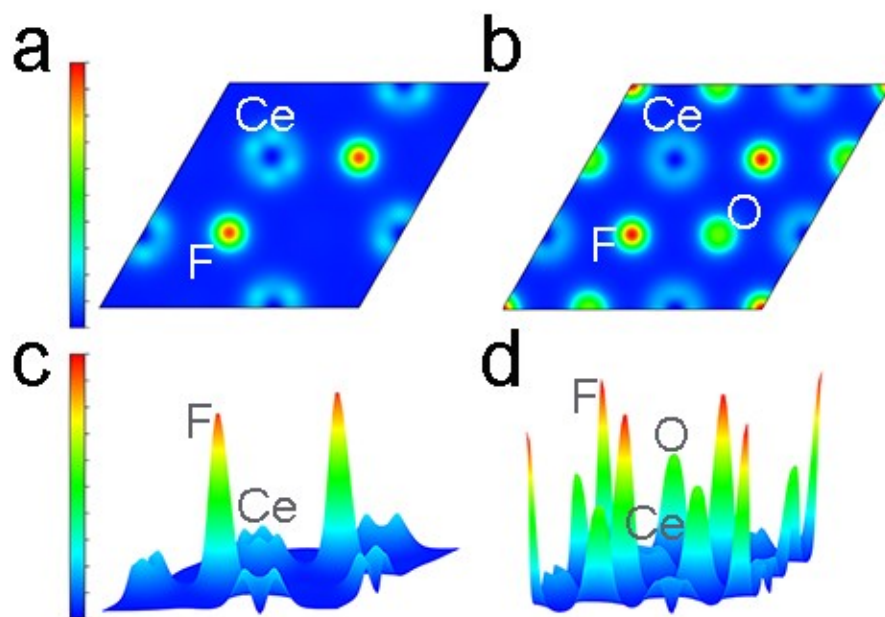

**Figure S8.** Two dimensional charge density distribution plots of pristine  $\text{CeF}_3$  (a,c) and  $\text{CeF}_3\text{-O}$  (b,d) on [001] plane.

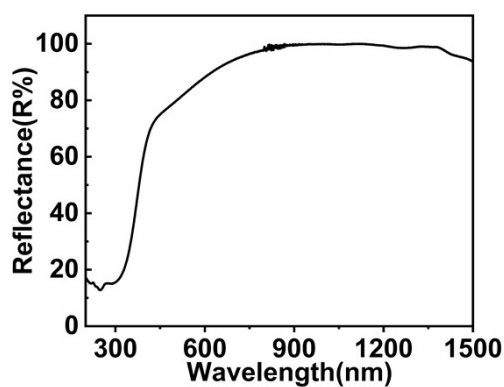

**Figure S9.** UV-Vis-NIR diffuse reflectance absorption (DRS) spectrum of  $\text{CeF}_3\text{-O}$ .

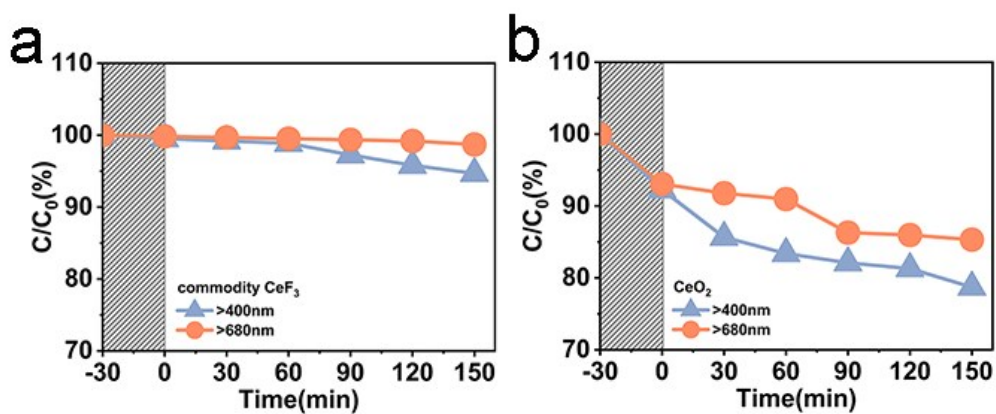

**Figure S10.** Photodegradation of TC-HCl by CeF<sub>3</sub>(a) and CeO<sub>2</sub>(b) under different cutoff filters ( $\lambda > 400$  nm and  $\lambda > 680$  nm). the photodegradation of TC-HCl by CeO<sub>2</sub> is is because the filter (cutoff 400nm) has an optical edge extending to about 380nm. Compared with both of commercial CeF<sub>3</sub> and CeO<sub>2</sub> under visible and NIR light, the CeF<sub>3</sub>-O has excellent photocatalysis activity under visible light. CeO<sub>2</sub> was synthesized by the similar calcination of precursor H<sub>25.5</sub>(NH<sub>4</sub>)<sub>10.5</sub>Ce<sub>9</sub>O<sub>27</sub>F<sub>18</sub> at 600°C for 1h.

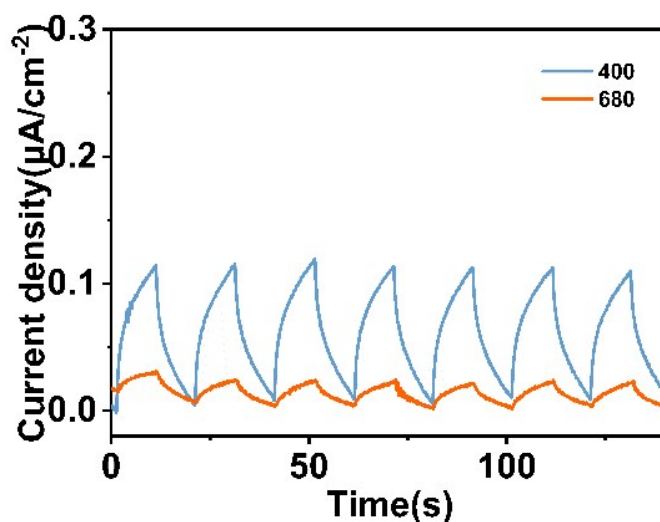

**Figure S11.** Photocurrent responses of the CeF<sub>3</sub>-O under visible light irradiation( $\lambda > 400$  nm) and near-infrared light irradiation( $\lambda > 680$  nm). The CeF<sub>3</sub>-O under visible light showed the stronger photocurrent transient response in comparison to that of near-infrared light, indicating the higher charge separation efficiency.

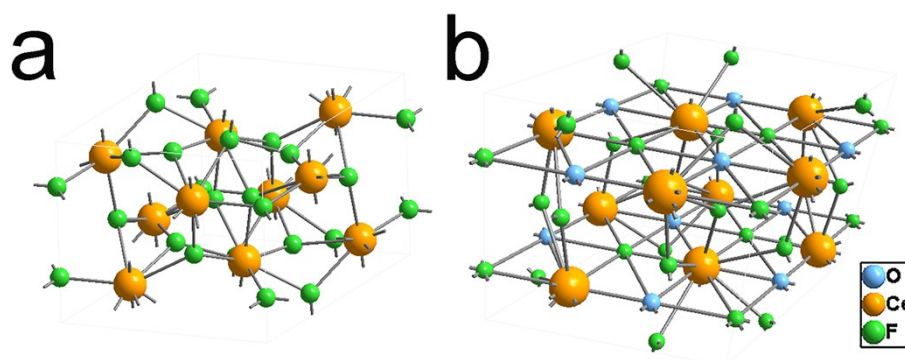

**Figure S12** the structure of pristine CeF<sub>3</sub> (a) and CeF<sub>3</sub>-O (b)

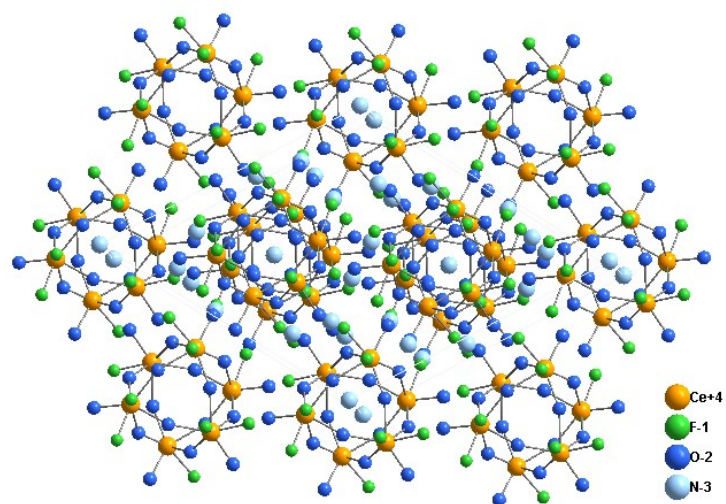

**Figure S13** the structure of precursor  $\text{H}_{25.5}(\text{NH}_4)_{10.5}\text{Ce}_9\text{O}_{27}\text{F}_{18}$

**Table S2.** Details of calculate structure for CeF<sub>3</sub>-O.

| <b>Configuration</b>   | <b>CeF<sub>3</sub>-O</b> |             |               |
|------------------------|--------------------------|-------------|---------------|
| Lattice parameter (A°) | a 7.128                  | b 7.128     | c 7.288       |
| Cell angle             | $\alpha$ 90°             | $\beta$ 90° | $\gamma$ 120° |
| Ce1                    | 0.33333                  | 0.33333     | 0.00000       |
| F1                     | 0.38000                  | 0.04600     | 0.16000       |
| F2                     | 0.33333                  | 0.66667     | 0.08330       |
| F3                     | 0.00000                  | 0.00000     | 0.25000       |
| O                      | 0.33333                  | 0.33333     | 0.25000       |

**Table S3.** The location and number of k-points

| <b>Number</b> | <b>Label</b> |          |          |      |
|---------------|--------------|----------|----------|------|
| 1             | GAMMA        | 0        | 0        | 0    |
| 2             | Y            | 0.5      | 0.5      | 0    |
| 3             | T            | 0.5      | 0.5      | 0.5  |
| 4             | T_2          | 0.5      | 0.5      | -0.5 |
| 5             | Z            | 0        | 0        | 0.5  |
| 6             | Z_2          | 0        | 0        | -0.5 |
| 7             | S            | 0        | 0.5      | 0    |
| 8             | R            | 0        | 0.5      | 0.5  |
| 9             | R_2          | 0        | 0.5      | -0.5 |
| 10            | DELTA_0      | -0.33321 | 0.333207 | 0    |
| 11            | F_0          | 0.333207 | 0.666793 | 0    |
| 12            | B_0          | -0.33321 | 0.333207 | 0.5  |
| 13            | B_2          | -0.33321 | 0.333207 | -0.5 |
| 14            | G_0          | 0.333207 | 0.666793 | 0.5  |
| 15            | G_2          | 0.333207 | 0.666793 | -0.5 |
